# Supplementary material for: The Frequency and Spread of a GABA-Gated Chloride Channel Target-Site Mutation and Its Impact on the Efficacy of Ethiprole Against Neotropical Brown Stink Bug, Euschistus heros (Hemiptera: Pentatomidae)
Source: MDPI journal article supplement (doi:10.3390/insects16040422), 2025-04-17
Supplement: s1 [file insects-3549135-supplementary.pdf › insects-3549135-supplementary.pdf]

**Table S1** – *Euschistus heros* populations collected from different Brazilian locations in three crop seasons (2021/22, 2022/23 and 2023/24) for monitoring and characterizing susceptibility to ethiprole (vial test).

| Crop Season | Population         | City                   | State | Latitude | Longitude | Collect Date |
|-------------|--------------------|------------------------|-------|----------|-----------|--------------|
| Vial test   |                    |                        |       |          |           |              |
|             | Susceptible strain | Paulínia               | SP    | -22,7617 | -47,1541  | 01/01/2013   |
| 2021/22     | 1                  | Lucas do Rio Verde     | MT    | -13,0063 | -55,9680  | 26/01/2022   |
|             | 2                  | Cascavel               | PR    | -25,0561 | -53,6427  | 25/01/2022   |
|             | 3                  | Primavera do Leste     | MT    | -15,3109 | -54,2423  | 15/02/2022   |
|             | 4                  | Rio Verde              | GO    | -17,4164 | -51,7426  | 18/02/2022   |
|             | 5                  | Sorriso                | MT    | -12,4264 | -55,6377  | 23/02/2022   |
|             | 6                  | Campo Grande           | MS    | -20,7077 | -54,7756  | 25/02/2022   |
|             | 7                  | Rondópolis             | MT    | -17,1619 | -54,7537  | 22/02/2022   |
|             | 8                  | Dourados               | MS    | -22,2354 | -54,9943  | 25/02/2022   |
|             | 9                  | Rolândia               | PR    | -23,3105 | -51,3695  | 07/03/2022   |
|             | 10                 | Chapadão do Sul        | MS    | -18,7799 | -52,6480  | 04/03/2022   |
|             | 11                 | Deciolândia            | MT    | -14,1833 | -51,5534  | 08/03/2022   |
|             | 12                 | Jataí                  | GO    | -17,8784 | -51,7204  | 24/03/2022   |
|             | 13                 | Luis Eduardo Magalhães | BA    | -12,1233 | -46,0258  | 06/04/2022   |
|             | 14                 | Chapadão do Sul        | MS    | -18,7722 | -52,6446  | 12/04/2022   |
| 2022/23     | 15                 | Sapezal                | MT    | -13,5082 | -58,7941  | 06/02/2023   |
|             | 16                 | Rolândia               | PR    | -23,2705 | -51,4845  | 08/02/2023   |
|             | 17                 | Brasnorte              | MT    | -12,7947 | -58,0892  | 10/02/2023   |
|             | 18                 | Sapezal                | MT    | -13,5082 | -58,7941  | 17/02/2023   |
|             | 19                 | Rolândia               | PR    | -23,2705 | -51,4845  | 08/03/2023   |
|             | 20                 | Eldorado               | MS    | -23,7741 | -54,2800  | 08/03/2023   |
|             | 21                 | Edeia                  | GO    | -17,3381 | -49,9344  | 09/03/2023   |
|             | 22                 | Campo Grande           | MS    | -20,3119 | -54,5364  | 09/03/2023   |
|             | 23                 | Guavirá                | MS    | -20,4888 | -56,5833  | 09/03/2023   |
|             | 24                 | Laguna Carapã          | MS    | -22,7088 | -55,1226  | 10/03/2023   |
|             | 25                 | Corbélia               | PR    | -24,7996 | -53,2965  | 13/03/2023   |
|             | 26                 | Dourados               | MS    | -22,2788 | -54,6495  | 15/03/2023   |
|             | 27                 | Cafelândia             | PR    | -24,6180 | -53,2971  | 26/03/2023   |
| 2023/24     | 28                 | Rio Verde              | GO    | -17,4578 | -50,9305  | 12/01/2024   |
|             | 29                 | Lucas do Rio Verde     | MT    | -13,0069 | -55,9686  | 25/01/2024   |
|             | 30                 | Cafelândia             | PR    | -24,5868 | -53,3464  | 01/02/2024   |
|             | 31                 | Corbélia               | PR    | -24,7792 | -53,2646  | 01/02/2024   |
|             | 32                 | Diamantino             | MT    | -14,1846 | -57,5540  | 15/02/2024   |
|             | 33                 | Rio Verde              | GO    | -17,7873 | -50,9978  | 17/02/2024   |
|             | 34                 | Toledo                 | PR    | -24,7258 | -53,7681  | 01/03/2024   |
|             | 35                 | Dourados               | MS    | -22,3010 | -54,6206  | 06/03/2024   |
|             | 36                 | Correntina             | BA    | -13,6511 | -45,2601  | 15/03/2024   |
|             | 37                 | Chapadão do Sul        | MS    | -18,7740 | -52,6485  | 22/03/2024   |
|             | 38                 | Chapadão do Sul        | MS    | -18,7740 | -52,6485  | 09/04/2024   |
|             | 39                 | Campo Grande           | MS    | -20,6504 | -54,6273  | 17/04/2024   |
|             | 40                 | Naviraí                | MS    | -23,0513 | -54,2388  | 17/04/2024   |
|             | 41                 | Eldorado               | MS    | -23,7557 | -54,2716  | 25/04/2024   |
